# Supplementary material for: Failure mechanism in fiber-shaped electrodes for lithium-ion batteries
Source: Royal Society of Chemistry journal article supplement (doi:10.1039/c5ta02242h), 2015-01-01
Supplement: c5ta02242h1.pdf [file c5ta02242h1.pdf]

## Supporting Information

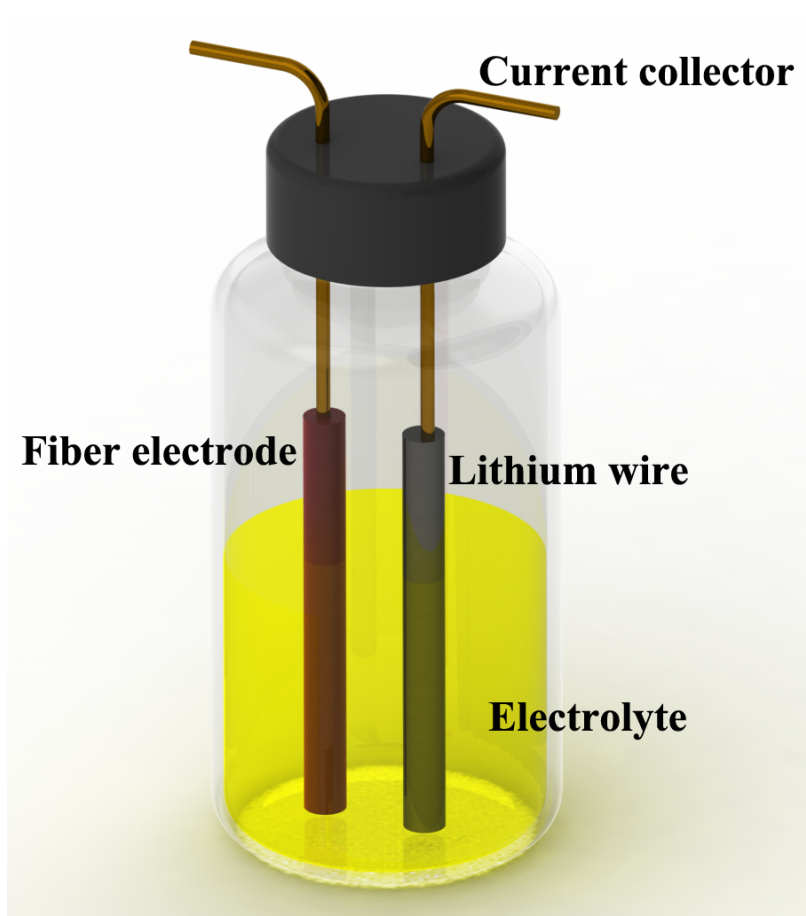

**Figure S1.** Test apparatus for the fiber-shaped electrode.

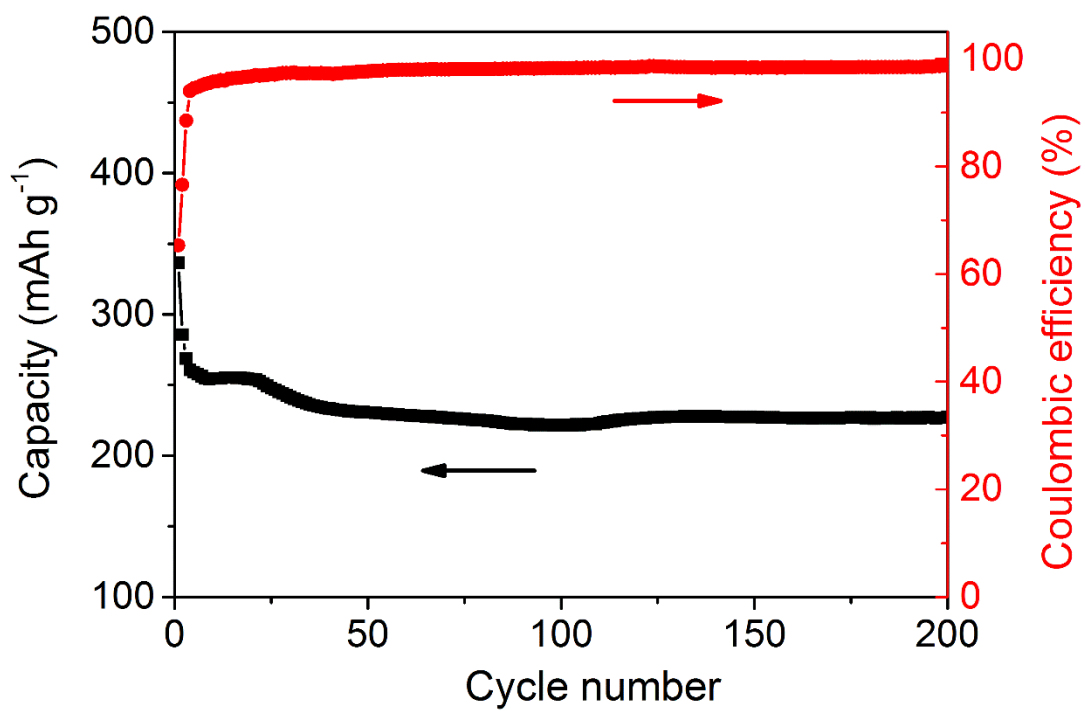

**Figure S2.** Long-life performance of a CNT fiber at a current density of 500 mA g<sup>-1</sup>. Delithiation capacity was provided here.

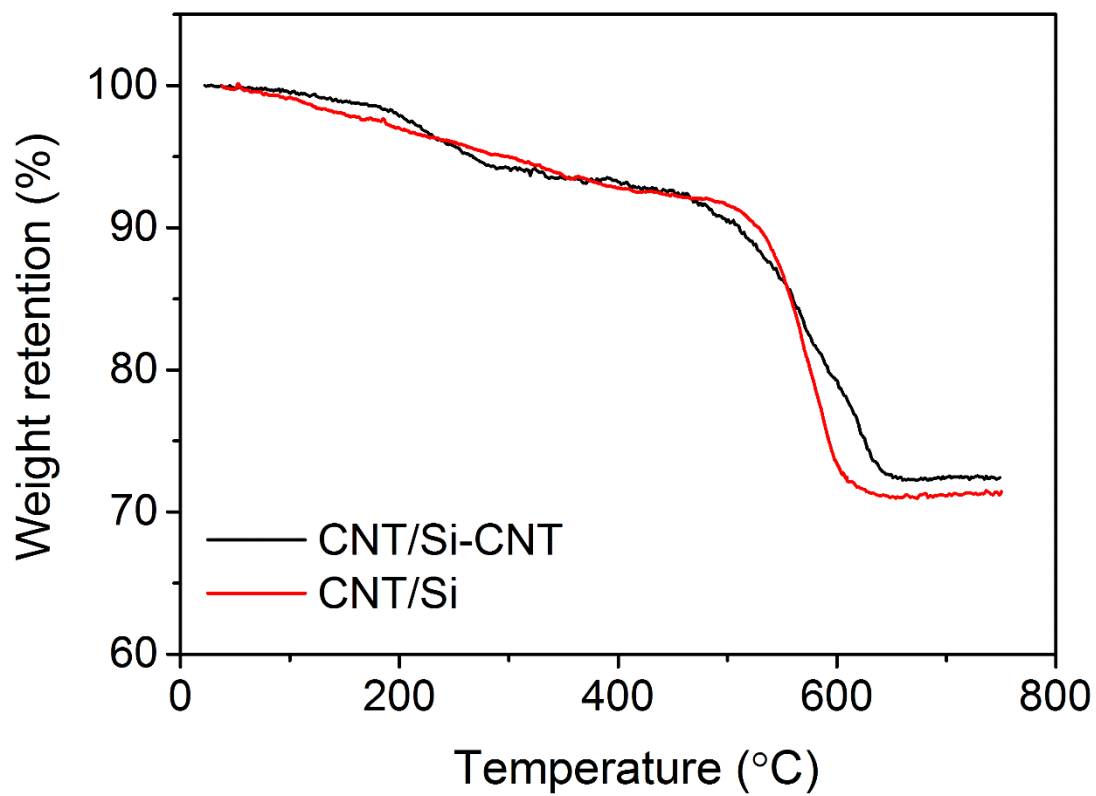

**Figure S3.** Thermogravimetric analysis of CNT/Si and CNT/Si-CNT fibers in air.

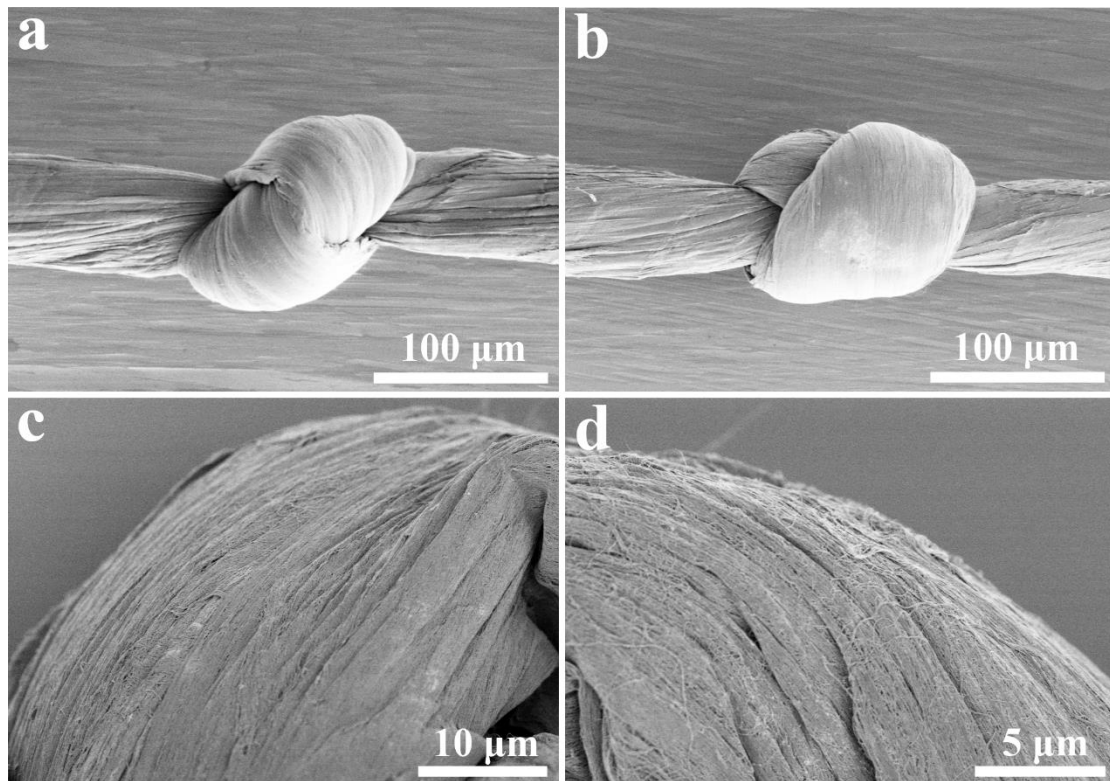

**Figure S4.** Knots made of CNT/Si fiber (a) and CNT/Si-CNT fiber (b). No obvious damages were found for CNT/Si fiber (c) and CNT/Si-CNT fiber (d) when undergoing a large deformation.

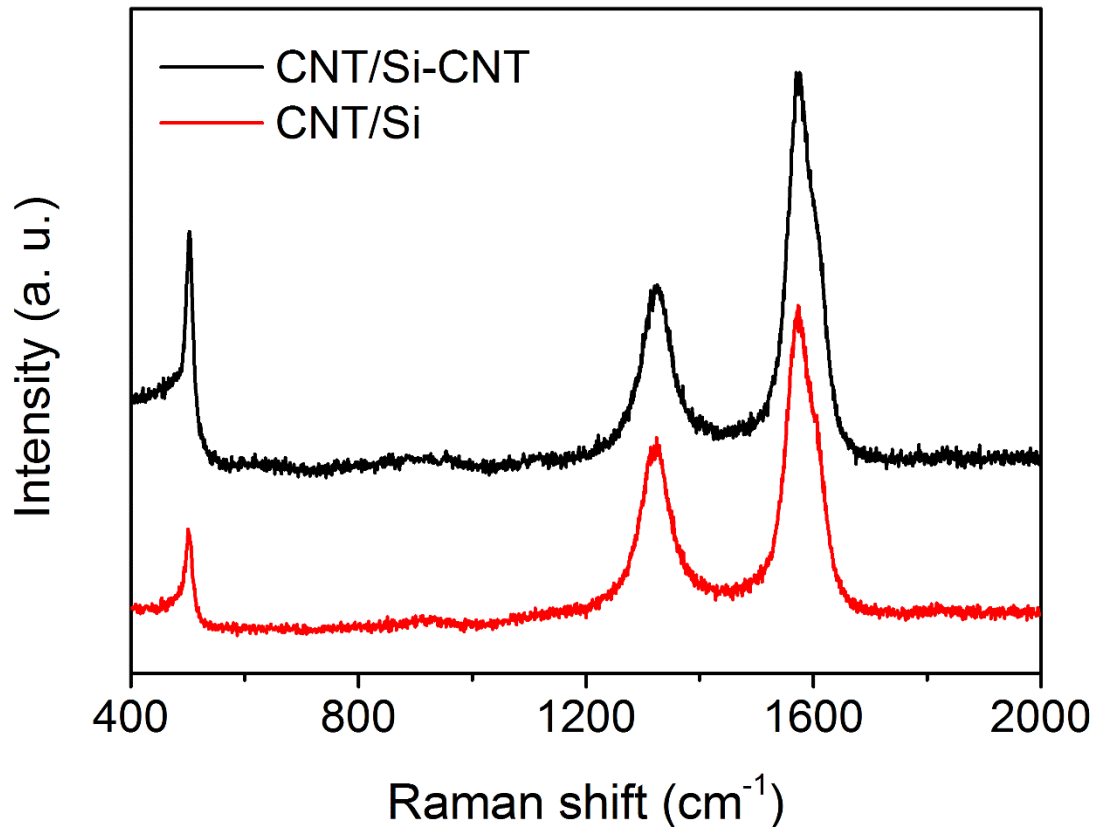

**Figure S5.** Raman spectra of CNT/Si and CNT/Si-CNT fibers.

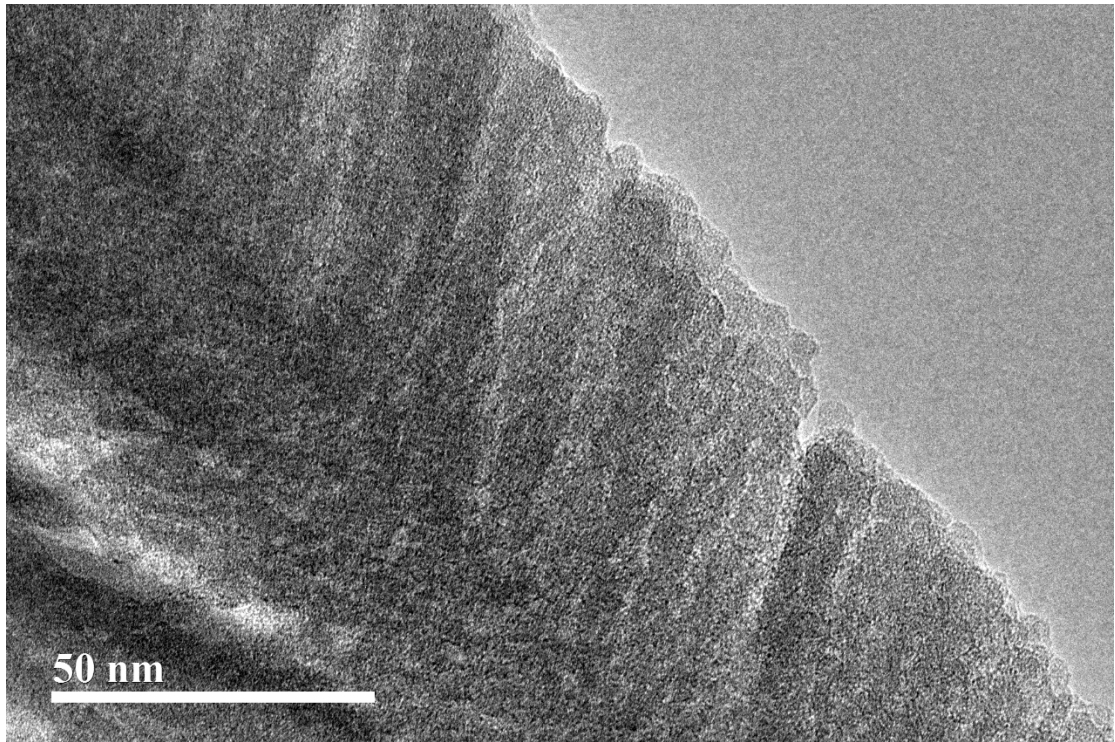

**Figure S6.** TEM image of a Si-coated CNT.

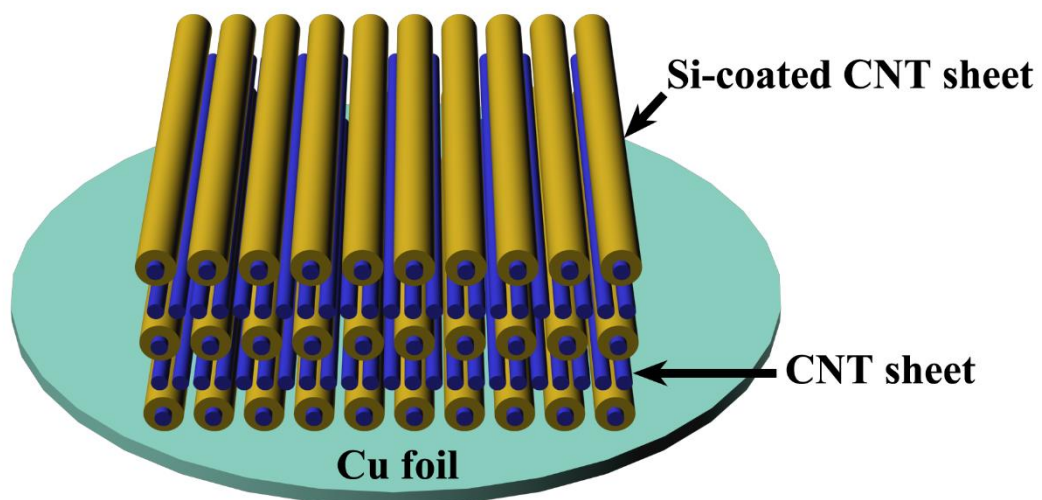

**Figure S7.** A planar electrode formed by alternately stacking CNT sheets and Si-coated CNT sheets on a copper foil.

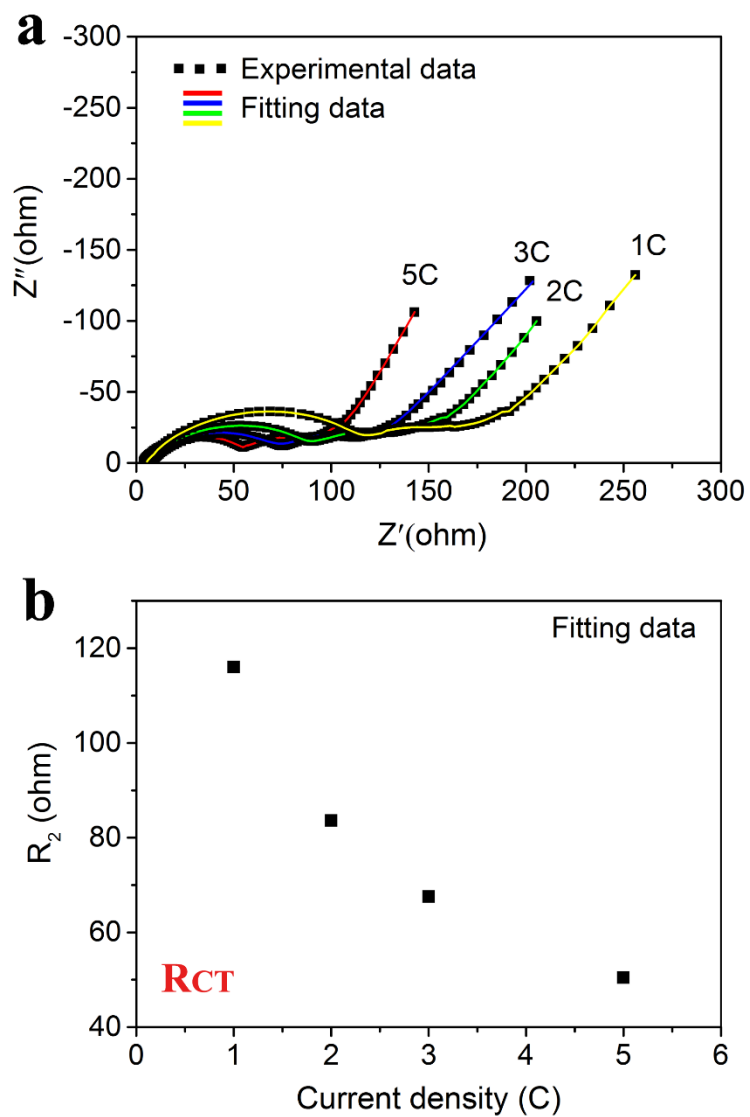

**Figure S8. a.** Nyquist plots of CNT/Si-CNT electrodes with different current densities at the end of lithiation after 50 cycles. **b.** Fitting data of  $R_{CT}$  for the CNT/Si-CNT electrodes corresponding to different current densities.



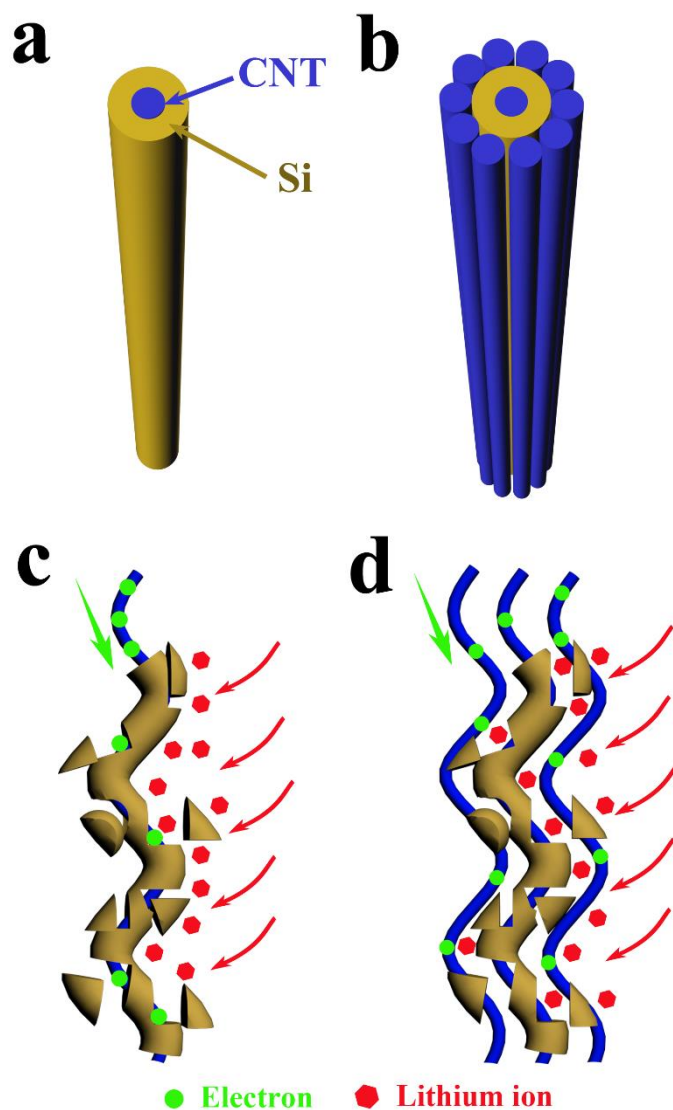

**Figure S9.** **a** and **b.** Schematic illustration of the contact between Si and CNT in CNT/Si and CNT/Si-CNT electrode, respectively. **c** and **d.** Schematic illustration of the failure behavior of CNT/Si and CNT/Si-CNT electrodes, respectively. The sandwiched CNT sheets can clamp the detached Si and enhance the electrochemical performance in the CNT/Si-CNT electrode.

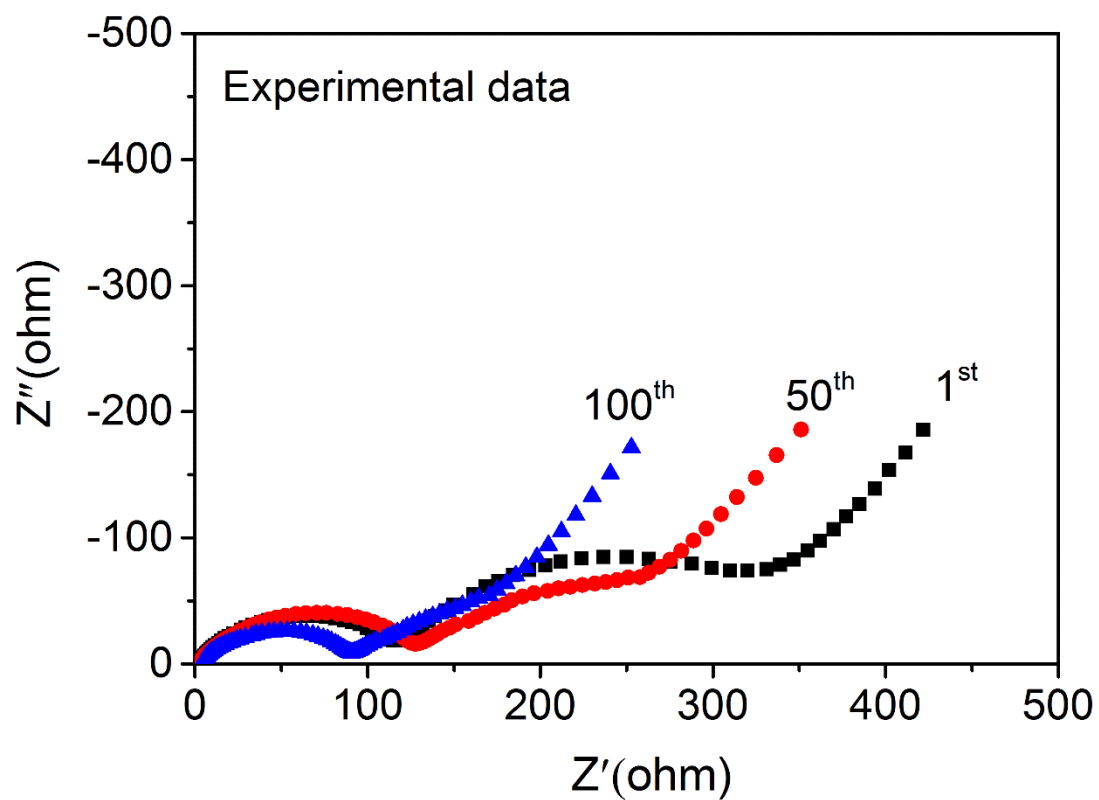

**Figure S10.** Nyquist plots of the CNT/Si-CNT electrode using the electrolyte of 1M  $\text{LiPF}_6$  in a mixture of ethylene carbonate and diethyl carbonate (volume ratio of 1/1). The  $R_{\text{INT}}$  indicates the dominant failure mechanism, which is the loss of contact between CNT and Si.
